# Supplementary material
Source: PubMed Central journal article supplement (PMC137891)

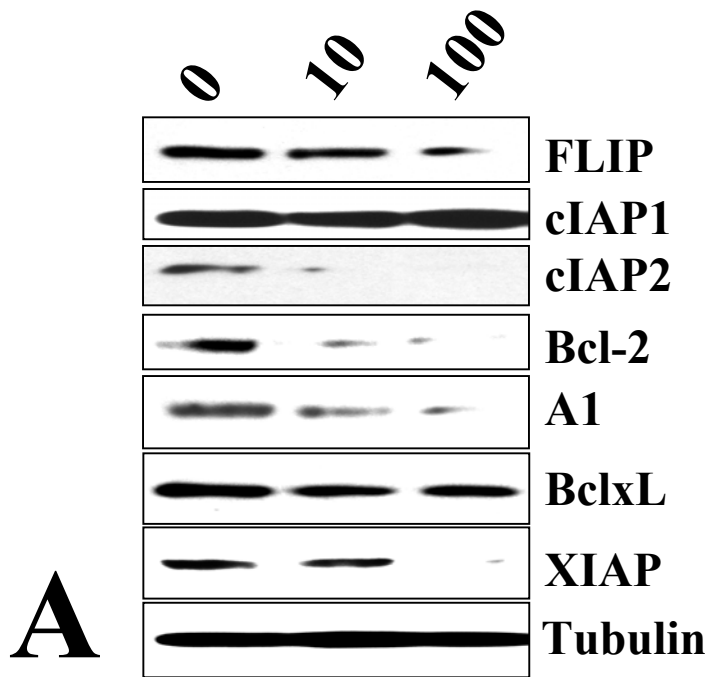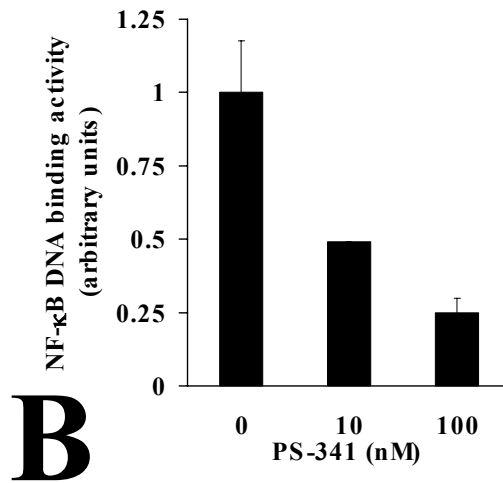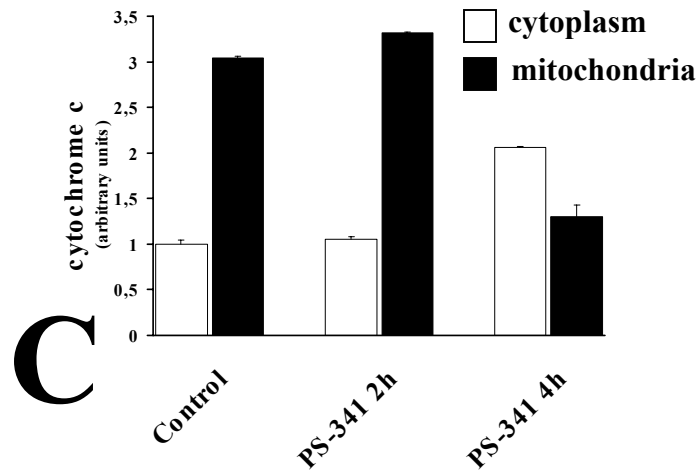

Supplement: pnas_202445099_5.pdf [file pnas_202445099_5.pdf]

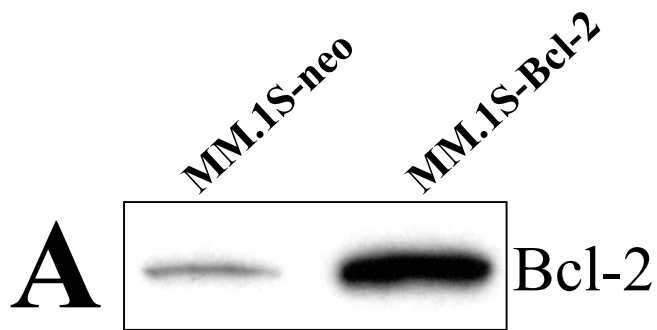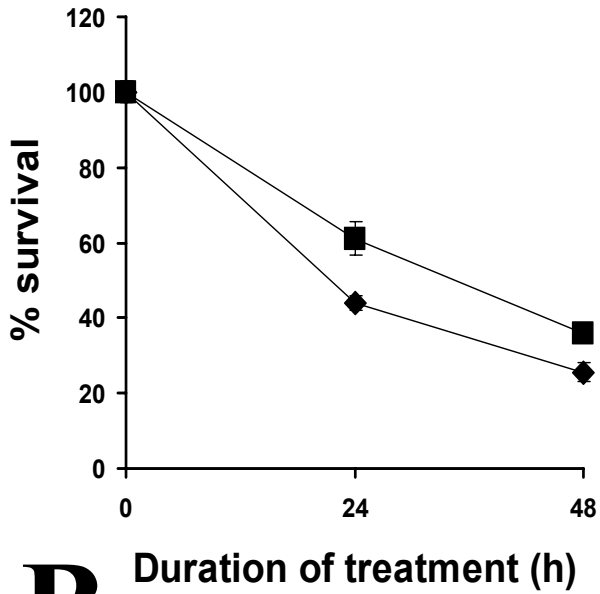

**B**

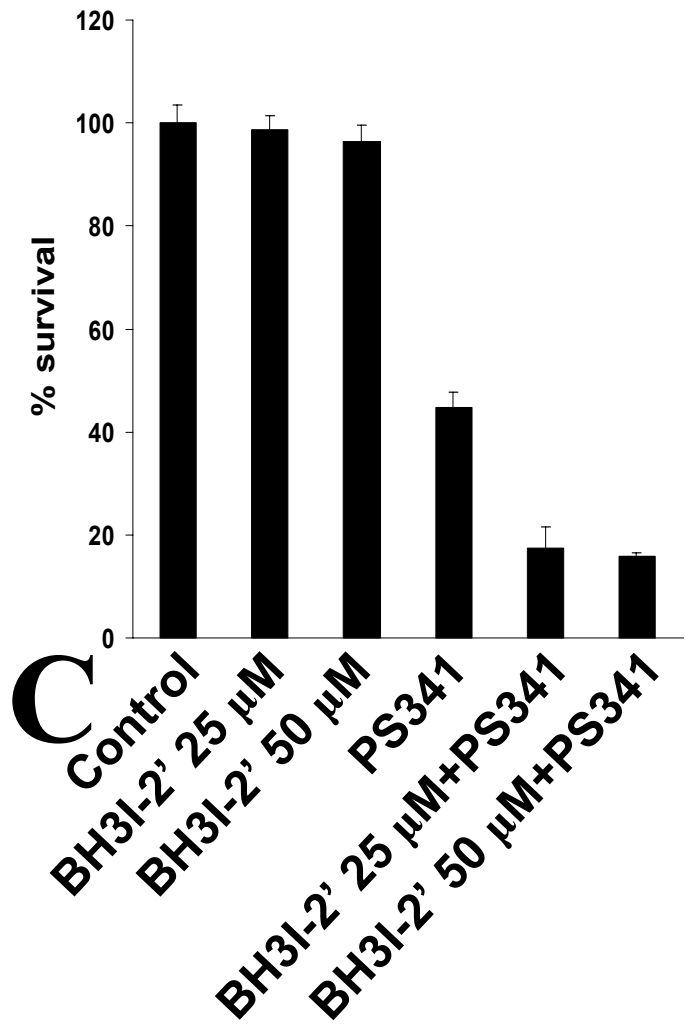

Supplement: pnas_202445099_6.pdf [file pnas_202445099_6.pdf]

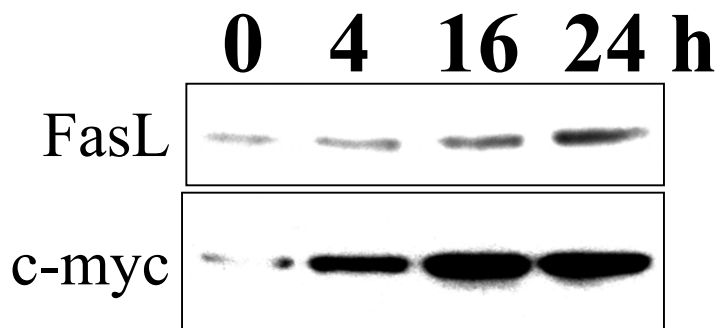

**B**

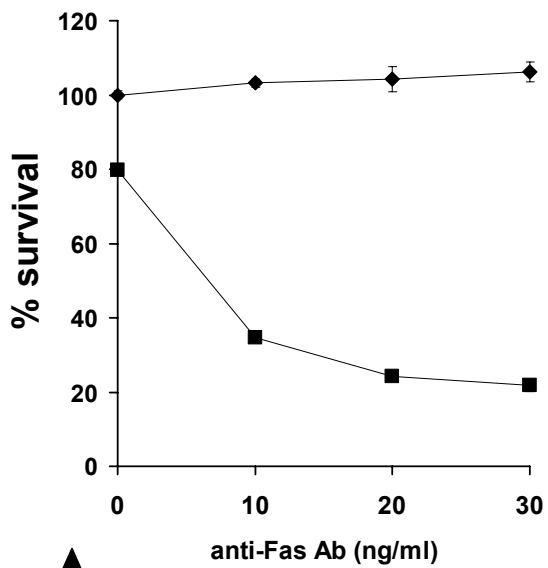

**A**

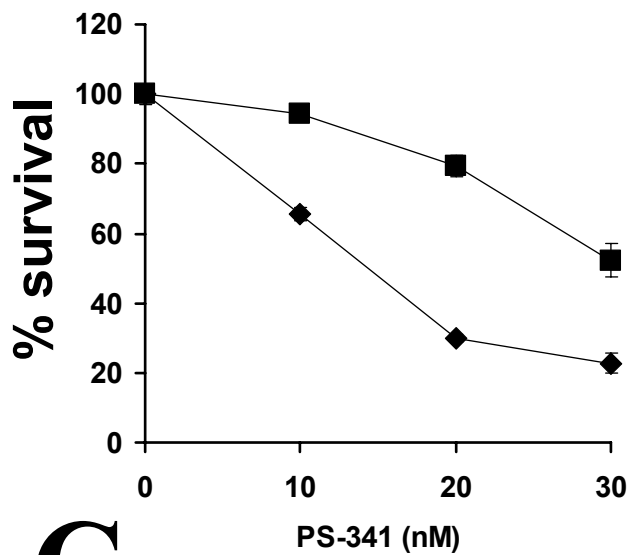

**C**

Supplement: pnas_202445099_7.pdf [file pnas_202445099_7.pdf]
